# Supplementary material for: Bivalent complexes of PRC1 with orthologs of BRD4 and MOZ/MORF target developmental genes in Drosophila
Source: PubMed Central journal article supplement — Genes Dev. 2017 Oct 1;31(19):1988–2002. doi: 10.1101/gad.305987.117 (PMC5710143; doi:10.1101/gad.305987.117), 2017-10-01

## **SUPPLEMENTARY INFORMATION:**

### **Bivalent complexes of PRC1 with orthologs of BRD4 and MOZ/MORF target developmental genes in *Drosophila***

Hyuckjoon Kang<sup>1,2</sup>\*, Youngsook L. Jung<sup>3</sup>\*, Kyle A. McElroy<sup>1,2,4</sup>, Barry M. Zee<sup>1,2</sup>, Heather A. Wallace<sup>1,2</sup>, Jessica L. Woolnough<sup>1,2</sup>, Peter J. Park<sup>3</sup>, and Mitzi I. Kuroda<sup>1,2</sup>#

1) Division of Genetics, Brigham and Women's Hospital, Boston, MA 02115. 2) Department of Genetics, Harvard Medical School, Boston, MA 02115. 3) Department of Biomedical Informatics, Harvard Medical School, Boston, MA 02115. 4) Department of Molecular and Cellular Biology, Harvard University, Cambridge, MA 02138.

\*Equal contribution

#Corresponding author: [mkuroda@genetics.med.harvard.edu](mailto:mkuroda@genetics.med.harvard.edu)

## List of PCR primers used for qPCR analysis

| Name | Primer set names | Sequences (5' to 3')   |
|------|------------------|------------------------|
| C1   | J312             | CAATCAGCAGATTCTCCGGCT  |
|      | J313             | AGCCGCACTCGCGCTTCTAC   |
| C2   | J318             | GGACCTGTGCAGTTCCTCC    |
|      | J319             | CCGTTATTTCTGTATCGCTGTG |
| R1   | J473             | AAAGCCAGCCACGAGGAA     |
|      | J474             | CGACTGGGCAGCAGGAAT     |
| R2   | J479             | CGGATGGGATGCTGAATG     |
|      | J480             | GAACTGGGCACCGGGAAT     |
| R3   | J455             | CCATAAGAAATGCCACTTTGC  |
|      | J456             | CTCTCACTCTCTCACTGTGAT  |
| R4   | J459             | TTTACTCCCAAAGCAACC     |
|      | J460             | TCGGCTTCTTATTCATCT     |
| R5   | J467             | TTAGGCCGAGTCGAGTGA     |
|      | J468             | AACAATAATGCCGCTGAT     |
| R6   | J461             | AGAAAGGACGTAACAAGC     |
|      | J462             | CATCTATGGATTCCGTTTTT   |
| R7   | J315             | ACGGCCATTACGAACGACA    |
|      | J328             | GGGCTATTCCAAGTCTGACG   |
| R8   | J471             | ATCTAGCGGCATGTGGACG    |
|      | J472             | GCAGATAGGCAGGTTTCGTG   |

C1 amplifies PKa-C1(CG4379) region, C2 amplifies Antp (CG1028) region, and R1-R8 amplify Ubx (CG10388) regions

**Supplemental Figure S1. Validation of Br140 and dBRD4 BioTAP tagged protein**

**expression in S2 cells and transgenic flies.** (A) Western blot analysis of nuclear extracts from S2 cells (left panel) and embryos (right panel) expressing BioTAP-N-Br140. Fusion proteins were detected by Peroxidase Anti-peroxidase (PAP) antibody. (B) Left panel: representation of short (dBRD4 S) and long isoforms (dBRD L) of dBRD4. BD1: bromodomain 1; BD2: bromodomain 2; NET: N-terminal ET (extraterminal) domain; CTD: C-terminal domain. Right panel: western blot analysis of nuclear extracts from S2 cells expressing BioTAP-N-dBRD4 or dBRD4-C-BioTAP. Fusion proteins were detected by PAP antibody. (C) Viability rescue tests of Br140 mutants by BioTAP-N-Br140 indicates functionality of the transgenic construct.

**Supplemental Figure S2. Comparison of peptide counts from BioTAP-XL pull-downs.** Total peptide counts from pull-downs of Pc, and E(z) (Kang et al. 2015), and dBRD4 and Br140 (this report) compared to input chromatin proteins from S2 cells and *Drosophila* embryos. Proteins are color-coded by protein complex. See Datafile S1 for complete results.

**Supplemental Figure S3. Most genes with strong occupancy by Pc are co-bound by Br140.**

(A) Heatmap as in Fig. 4, but showing all bound genes rather than just co-bound loci from embryo ChIP-seq enrichment patterns for BioTAP-tagged Pc, Br140, dBRD4 and indicated histone H3 modifications within  $\pm 10$  kb of TSSs of Pc-only, Br140-only, or co-bound genes. (B) Venn diagram of overlap between Pc- and Br140-bound genes in embryos using a higher threshold for Pc peak calling. (C) Heatmaps of embryo co-bound and Pc-only ChIP-seq enrichment patterns using a stringent threshold, showing that practically all strong Pc bound genes are also enriched for Br140. (D) Gene expression variability plots show higher variability in Cluster 1 (top) and Cluster 2 (bottom) co-bound genes when compared to globally expressed,

or constitutive, genes. Upper, middle, and lower lines in the boxes represent upper, median, and lower quartiles, respectively. *P*-values were determined using Wilcoxon rank-sum test.

**Supplemental Figure S4. Post-translational modifications on histone tails enriched in**

**Br140- and Pc-BioTAP-XL affinity pull-downs.** (A) Schematic of experimental procedure for recovery of DNA and protein samples from BioTAP-XL affinity pull-downs. Samples intended for PTM analysis (purple arrows) were separated and underwent additional anhydride derivatization steps prior to LC-MS. (B) Relative abundance of methylation at H4K20 (specifically the 20-23 H4 peptide NH<sub>3</sub>-K<sub>20</sub>VLR-COOH) in total histones and histones enriched by BioTAP-tagged Br140 and Pc. (C) Relative abundance of combinatorial acetylation patterns at H3K18 and K23 (specifically the 18-26 H3 peptide NH<sub>3</sub>-K<sub>18</sub>QLATK<sub>23</sub>AAR-COOH) in total histones and histones enriched by BioTAP-tagged Br140 and Pc. (D) Relative abundance of combinatorial modification patterns at H3K9 and K14 (specifically the 9-17 H3 peptide NH<sub>3</sub>-K<sub>9</sub>STGGK<sub>14</sub>APR-COOH) in total histones and histones enriched by BioTAP-tagged Br140 and Pc. (E) Relative abundance of H4 acetylation levels (specifically the 4-17 H4 peptide NH<sub>3</sub>-GK<sub>5</sub>GGK<sub>8</sub>GLGK<sub>12</sub>GGAK<sub>16</sub>R-COOH) in total histones and histones enriched by BioTAP-tagged Br140 and Pc. For clarity of the figure, only the number of acetyl groups (0, 1, 2, 3, or 4 acetyls) is plotted rather than the specific position where the acetyl group is localized. (F) Relative abundance of combinatorial modification patterns on H3K27 and K36 (specifically the 27-40 canonical H3 peptide NH<sub>3</sub>-K<sub>27</sub>SAPATGGVK<sub>36</sub>KPHR-COOH) in total histones and histones enriched by BioTAP-tagged Br140 and Pc.



**Supplemental Figure S5. Co-bound genes in HUES64 cells are enriched for developmental GO terms.** Bubble plot showing significantly enriched GO terms from the PANTHER database for BRD1-only and co-bound genes. Significantly enriched terms after Bonferroni correction (adjusted p-value <0.01) were plotted in R. Bubble fill represents adjusted p-value and bubble size represents gene percentage in each category. The bubbles are ranked according to descending fold enrichment (observed/total number of genes per category).

A

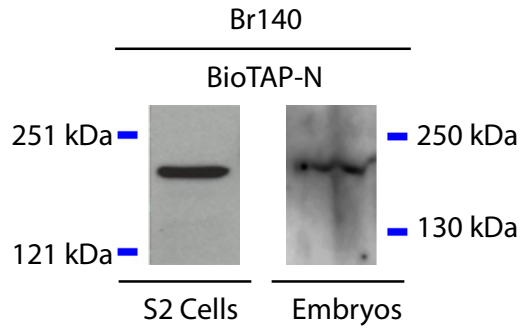

B

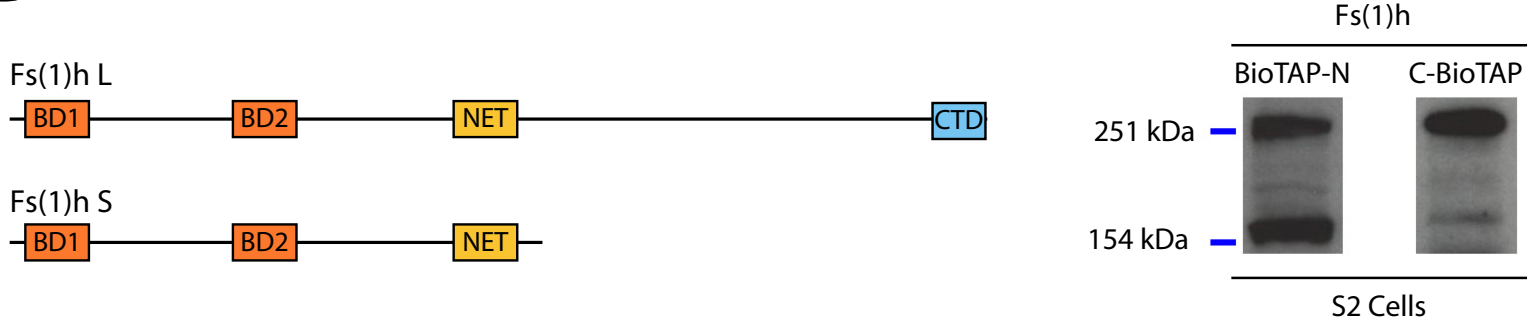

C

| Experimental cross                                                                                            | Counted total # of viable F1 | Genotype                                                                    | Viable F1 with this genotype | Observed proportion (Expected mendelian proportion) |
|---------------------------------------------------------------------------------------------------------------|------------------------------|-----------------------------------------------------------------------------|------------------------------|-----------------------------------------------------|
| <i>yw ; Br140<sup>S203</sup>/CyO ; P{BioTAP-N-Br140}/+</i><br>X<br><i>yw ; Br140<sup>S781</sup>/CyO ; +/+</i> | 281                          | <i>yw ; Br140<sup>S203</sup>/Br140<sup>S781</sup> ; +/+</i>                 | 0                            | 0 (0.2)                                             |
|                                                                                                               |                              | <i>yw ; Br140<sup>S203</sup>/Br140<sup>S781</sup> ; P{BioTAP-N-Br140}/+</i> | 57                           | 0.202 (0.2)                                         |
| <i>yw ; Br140<sup>S203</sup>/CyO ; P{BioTAP-N-Br140}/+</i><br>X<br><i>yw ; Df(2R)BSC263/CyO ; +/+</i>         | 139                          | <i>yw ; Br140<sup>S203</sup>/Df(2R)BSC263 ; +/+</i>                         | 0                            | 0 (0.2)                                             |
|                                                                                                               |                              | <i>yw ; Br140<sup>S203</sup>/Df(2R)BSC263 ; P{BioTAP-N-Br140}/+</i>         | 38                           | 0.273 (0.2)                                         |

| Complex              | Symbol   | M.W.<br>(kDa) | Pc     | E(z)   | Fs(1)h       |      | Br140   |        | Input   |        |
|----------------------|----------|---------------|--------|--------|--------------|------|---------|--------|---------|--------|
|                      |          |               | Embryo | Embryo | S2 Cell      |      | S2 Cell | Embryo | S2 Cell | Embryo |
|                      |          |               |        |        | Long + Short | Long |         |        |         |        |
| dMOZ/MORF            | Br140    | 157.02        | 40     | 0      | 7            | 2    | 210     | 27     | 0       | 5      |
|                      | enok     | 254.52        | 34     | 0      | 6            | 7    | 130     | 28     | 1       | 4      |
|                      | Eaf6     | 24.39         | 5      | 0      | 3            | 1    | 18      | 3      | 1       | 0      |
|                      | Ing5     | 32.06         | 4      | 0      | 2            | 1    | 11      | 3      | 0       | 0      |
| dMOZ/MORF interactor | elg1     | 129.29        | 1      | 0      | 0            | 1    | 32      | 16     | 0       | 5      |
| TrxG                 | ash1     | 246.11        | 3      | 0      | 2            | 1    | 10      | 3      | 0       | 0      |
|                      | Fs(1)h   | 205.93        | 61     | 2      | 476          | 284  | 9       | 6      | 7       | 12     |
| PRC1                 | Psc      | 169.73        | 92     | 5      | 14           | 7    | 1       | 5      | 0       | 2      |
|                      | Su(z)2   | 149.48        | 72     | 0      | 13           | 3    | 5       | 2      | 0       | 0      |
|                      | Sce      | 47.23         | 49     | 2      | 5            | 3    | 3       | 1      | 1       | 2      |
|                      | Pc       | 43.95         | 21     | 6      | 5            | 3    | 4       | 1      | 1       | 1      |
|                      | ph (p+d) | 167.18        | 66     | 1      | 6            | 2    | 2       | 2      | 0       | 0      |
|                      | Scm      | 93.49         | 12     | 18     | 4            | 0    | 1       | 1      | 2       | 3      |
| PRC2                 | Su(z)12  | 100.04        | 3      | 83     | 0            | 3    | 0       | 1      | 0       | 1      |
|                      | E(z)     | 87.44         | 0      | 23     | 0            | 0    | 0       | 0      | 1       | 1      |
|                      | esc/escl | 47.96         | 1      | 42     | 2            | 0    | 0       | 0      | 1       | 1      |
|                      | Pcl      | 114.57        | 1      | 33     | 0            | 0    | 1       | 0      | 0       | 0      |
|                      | jing     | 181.09        | 0      | 30     | 0            | 0    | 0       | 0      | 0       | 0      |
|                      | Jarid2   | 252.37        | 4      | 33     | 7            | 3    | 4       | 1      | 0       | 8      |
|                      | Caf1-55  | 48.6          | 3      | 32     | 7            | 6    | 7       | 2      | 6       | 8      |

**A**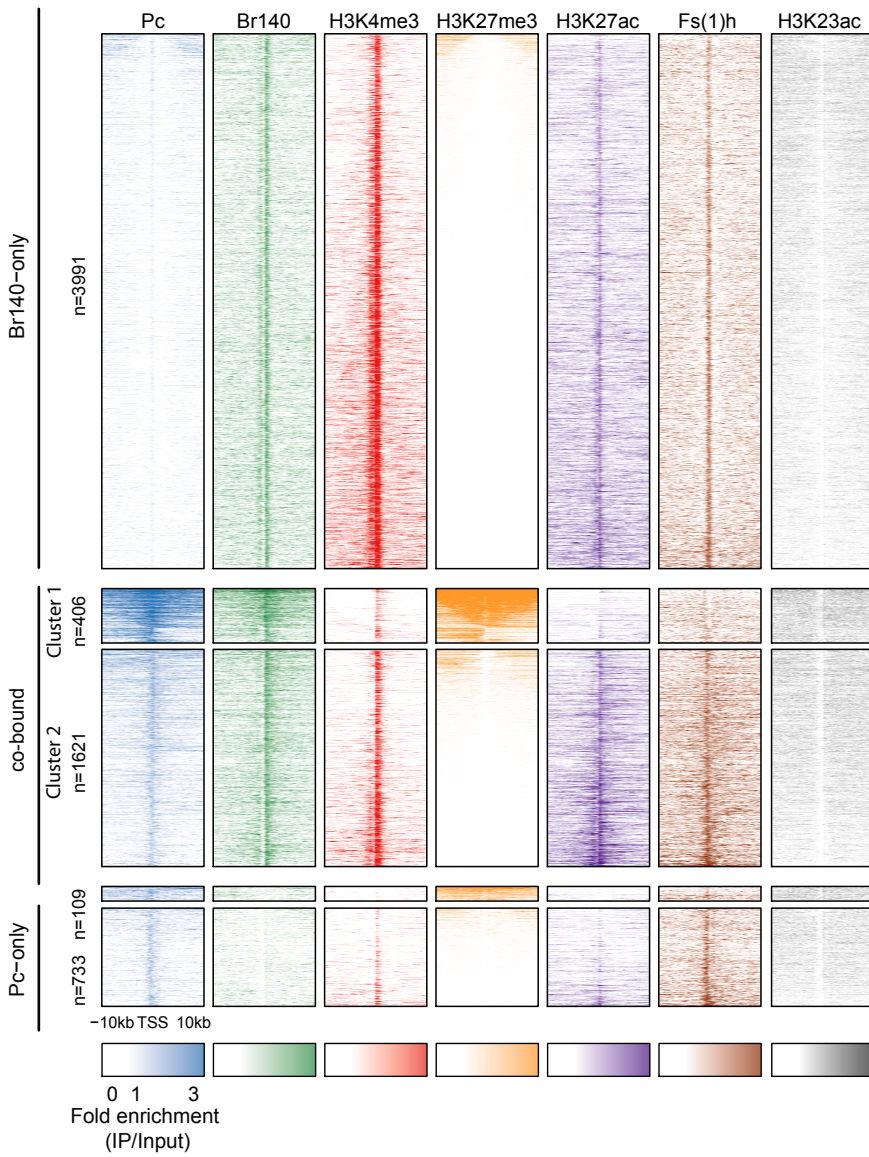**B**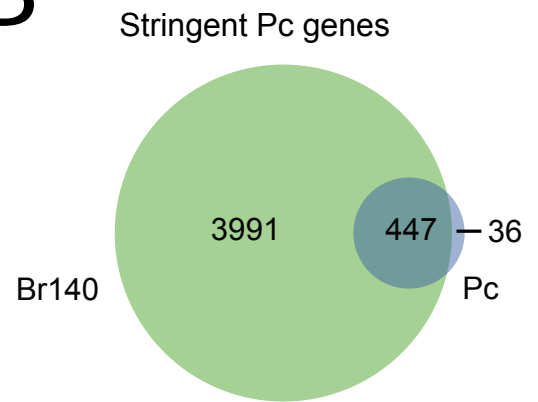**D**

Expression variability

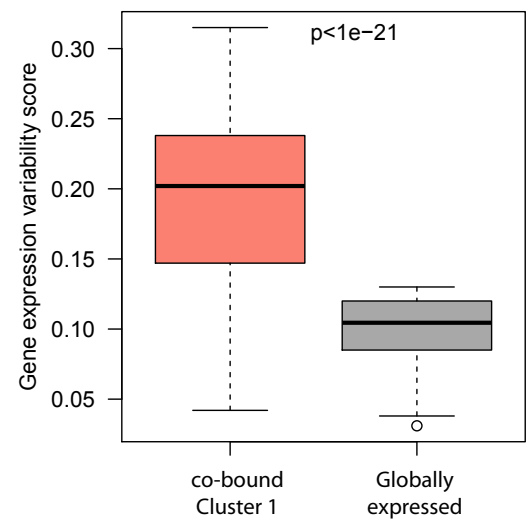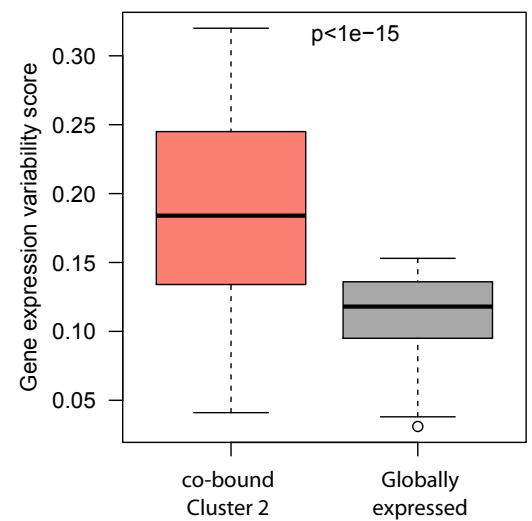**C**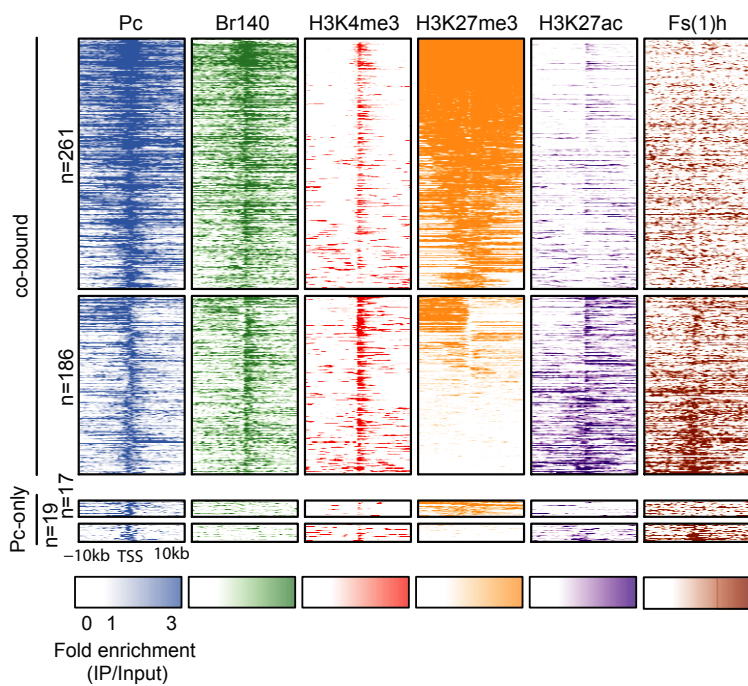

## A

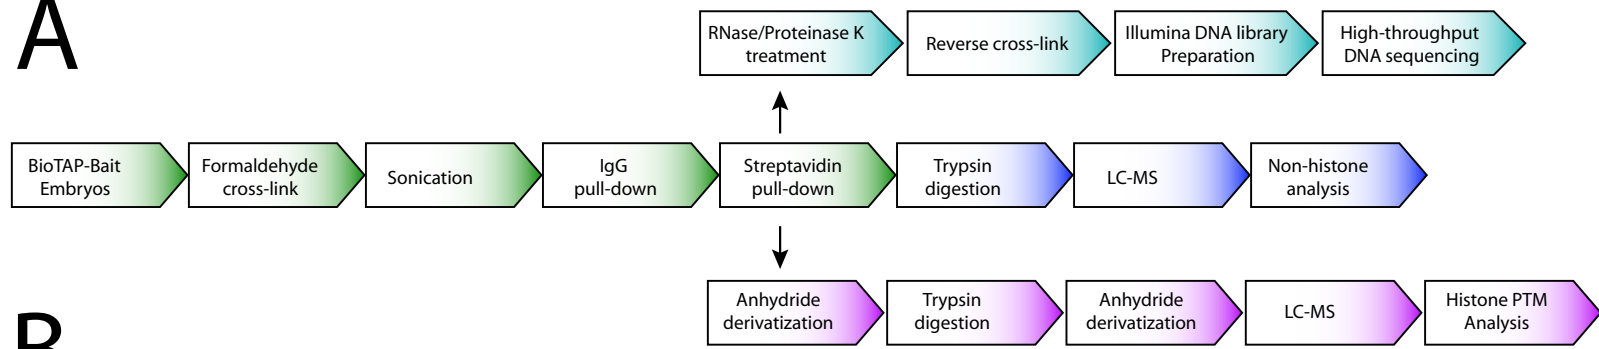

## B

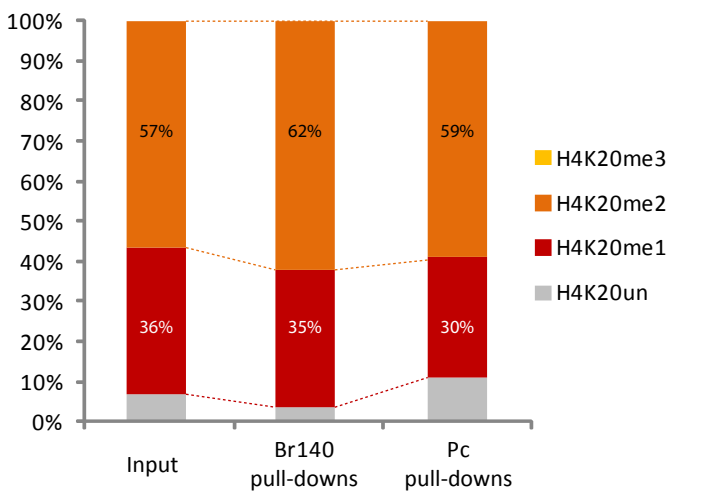

## E

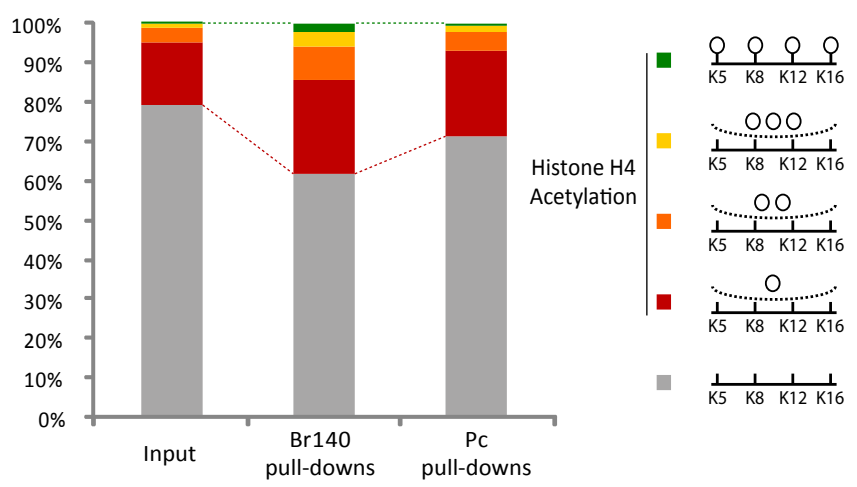

## C

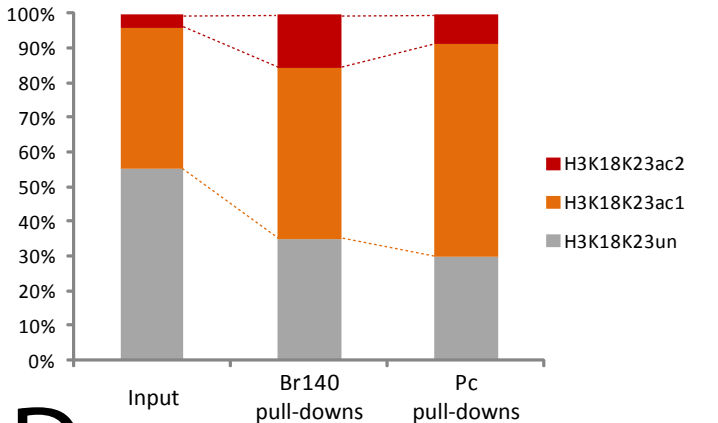

## F

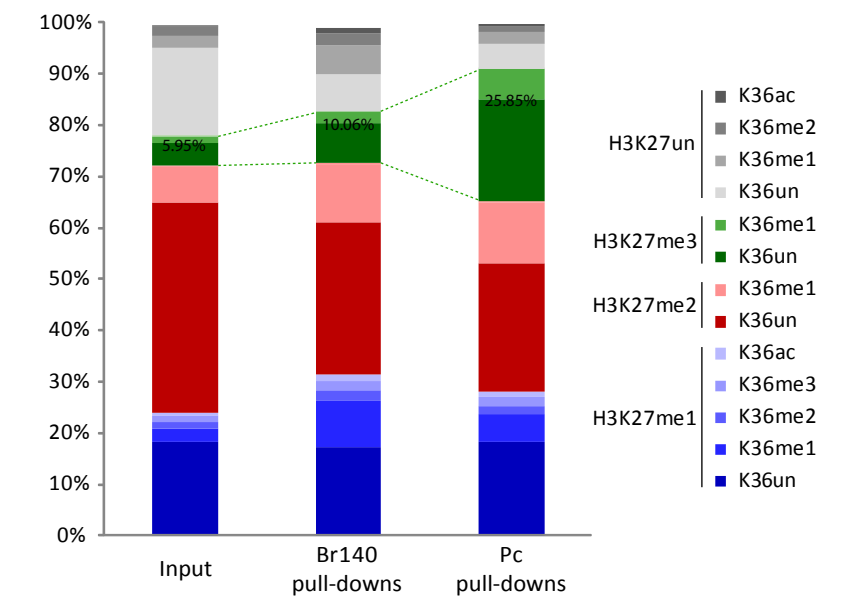

## D

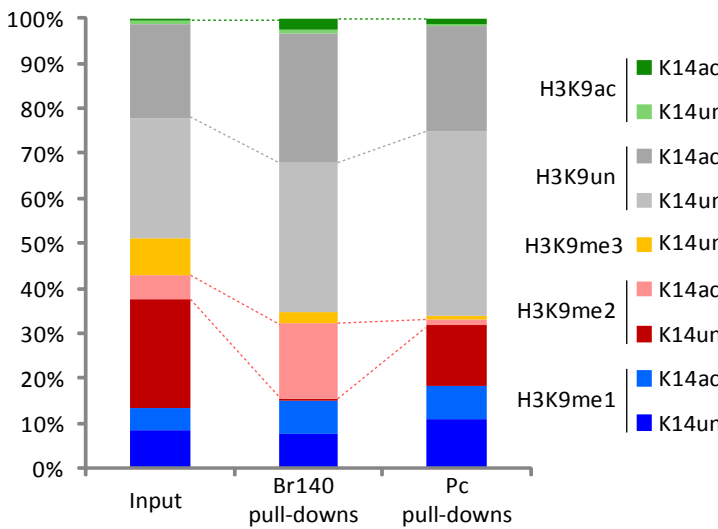

# Supplemental\_Fig\_S 5.

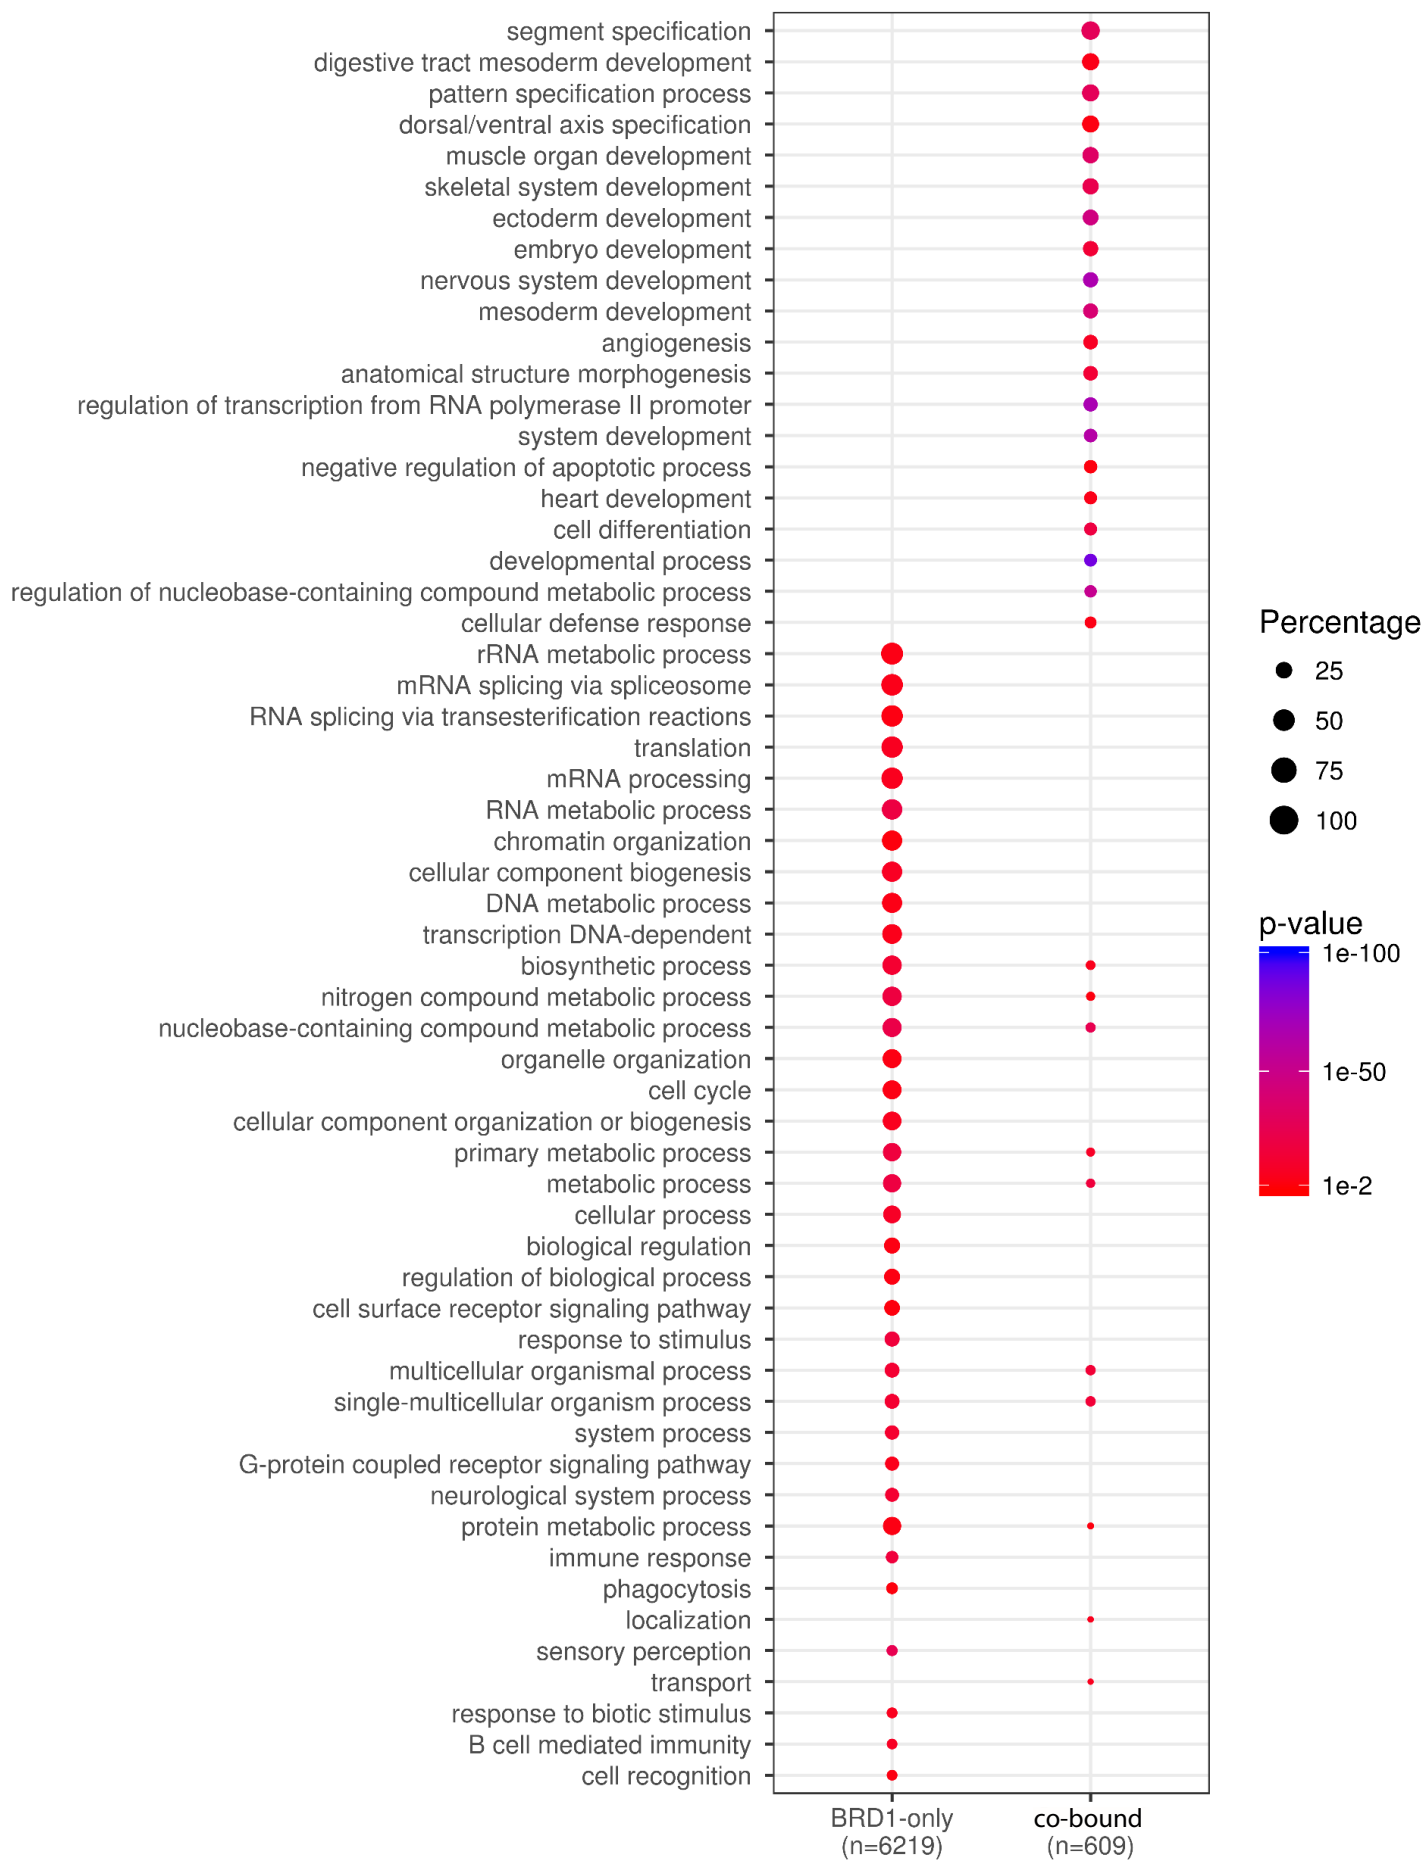

Supplement: supp_gad.305987.117_Supplemental_Information1.pdf [file supp_gad.305987.117_Supplemental_Information1.pdf]
